# Supplementary material
Source: PubMed Central journal article supplement (PMC6453184)
Supplement: ESO_677197_Supplementary_Material.pdf [file ESO_677197_Supplementary_Material.pdf]

**Supplementary Table 1. Conditional logistic regression analyses showing the association between cystatin C and early neurological deterioration**

|                                | <b>Unadjusted OR<br/>(95% CI)</b> | <b>P value</b> | <b>Model 1<br/><u>Adjusted OR(95% CI)</u></b> | <b>P value</b> | <b>Model 2<br/><u>Adjusted OR(95% CI)</u></b> | <b>P value</b> |
|--------------------------------|-----------------------------------|----------------|-----------------------------------------------|----------------|-----------------------------------------------|----------------|
| <b>Cystatin C</b>              |                                   | 0.026          |                                               | 0.026          |                                               | 0.037          |
| <b>Q1</b>                      | 1 (Reference)                     |                | 1 (Reference)                                 |                | 1 (Reference)                                 |                |
| <b>Q2</b>                      | 1.33(0.63-2.82)                   | 0.457          | 1.59(0.70-3.58)                               | 0.267          | 1.33(0.61-2.90)                               | 0.474          |
| <b>Q3</b>                      | 2.14(1.07-4.31)                   | 0.032          | 2.75(1.25-6.04)                               | 0.012          | 2.34(1.11-4.93)                               | 0.025          |
| <b>Q4</b>                      | 2.53(1.28-5.03)                   | 0.008          | 3.12(1.36-7.16)                               | 0.007          | 2.76(1.25-6.11)                               | 0.012          |
| <b>Sex</b>                     | 0.79(0.50-1.26)                   | 0.324          | 0.64(0.36-1.13)                               | 0.126          | 0.50(0.27-0.95)                               | 0.035          |
| <b>Hypertension</b>            | 1.20(0.76-1.88)                   | 0.432          | 1.08(0.65-1.79)                               | 0.761          | 1.07(0.65-1.76)                               | 0.801          |
| <b>CHD</b>                     | 3.35(1.26-8.88)                   | 0.015          | 2.84(0.94-8.58)                               | 0.064          | 2.73(0.91-8.22)                               | 0.073          |
| <b>Previous<br/>TIA/stroke</b> | 1.40(0.71-2.77)                   | 0.335          | 1.34(0.64-2.81)                               | 0.445          | 1.30(0.62-2.72)                               | 0.492          |
| <b>Smoking</b>                 | 0.62(0.19-2.04)                   | 0.427          | 0.55(0.16-1.95)                               | 0.355          | 0.56(0.16-1.98)                               | 0.367          |
| <b>Hemoglobin</b>              | 0.98(0.86-1.10)                   | 0.686          | 1.00(0.86-1.17)                               | 0.973          | 1.01(0.86-1.17)                               | 0.941          |
| <b>Triglyceride</b>            | 1.00(0.99-1.00)                   | 0.302          | 1.00(0.99-1.00)                               | 0.215          | 1.00(0.99-1.00)                               | 0.213          |
| <b>HDL<br/>cholesterol</b>     | 1.00(0.98-1.02)                   | 0.992          | 1.01(0.99-1.03)                               | 0.535          | 1.01(0.99-1.03)                               | 0.556          |

|                              |                  |        |                  |       |                  |       |
|------------------------------|------------------|--------|------------------|-------|------------------|-------|
| <b>Significant stenosis</b>  | 1.39(0.88-2.18)  | 0.155  | 1.33(0.80-2.22)  | 0.265 | 1.37(0.83-2.26)  | 0.215 |
| <b>Lesion location</b>       |                  | 0.006  |                  | 0.026 |                  | 0.030 |
| <b>Anterior circulation</b>  | 1(Reference)     |        | 1(Reference)     |       | 1(Reference)     |       |
| <b>Posterior circulation</b> | 0.69(0.39-1.22)  | 0.204  | 0.68(0.37-1.27)  | 0.228 | 0.72(0.39-1.31)  | 0.279 |
| <b>Multiple territory</b>    | 2.10(1.17-3.76)  | 0.013  | 1.95(1.02-3.73)  | 0.044 | 1.94(1.02-3.66)  | 0.042 |
| <b>GFR</b>                   | 1.00(0.99-1.01)  | 0.721  | 1.01(1.00-1.02)  | 0.117 | Not included     |       |
| <b>Age</b>                   | 1.06(1.03-1.09)  | <0.001 | 1.04(1.00-1.08)  | 0.037 | 1.04(1.00-1.08)  | 0.031 |
| <b>Infection</b>             | 2.31(1.17-4.56)  | 0.016  | 1.63(0.74-3.59)  | 0.230 | 1.61(0.73-3.56)  | 0.240 |
| <b>WBC (10/ul)</b>           | 6.65(1.27-34.89) | 0.025  | 4.90(0.83-28.98) | 0.080 | 4.26(0.74-24.61) | 0.106 |
| <b>FBS</b>                   | 1.01(1.00-1.01)  | 0.022  | 1.01(1.00-1.01)  | 0.068 | 1.01(1.00-1.01)  | 0.033 |

CHD: coronary heart disease, GFR: glomerular filtration rate, WBC: white blood cell, FBS: fasting blood sugar,

Model 1: Adjusting for cystatin C, age, sex, hypertension, smoking, CHD, previous stroke/TIA, lesion location, GFR, FBS, WBC, Hemoglobin, HDL, TG, infections, significant stenosis

Model 2: Adjusting for cystatin C, age, sex, hypertension, smoking, CHD, previous stroke/TIA, lesion location, FBS, WBC, Hemoglobin, HDL, TG, infection, significant stenosis

**Supplementary Table 2. Baseline characteristics of the young patients**

|                                        | <b>Total</b><br><b>(n=270)</b> | <b>END group</b><br><b>(n=17, 6.3%)</b> | <b>Non-END group</b><br><b>(n=253, 93.7%)</b> | <b>P-value</b> |
|----------------------------------------|--------------------------------|-----------------------------------------|-----------------------------------------------|----------------|
| <b>Age (mean±SD), years</b>            | 49.8±7.6                       | 50.0±8.3                                | 49.8±7.5                                      | 0.932          |
| <b>Male, n (%)</b>                     | 179(66.3)                      | 12(70.6)                                | 167(66.0)                                     | 0.699          |
| <b>BMI (mean±SD), kg/m<sup>2</sup></b> | 24.3±3.3                       | 24.3±3.7                                | 24.3±3.3                                      | 0.947          |
| <b>Hypertension, n (%)</b>             | 77(28.5)                       | 4(23.5)                                 | 73(28.9)                                      | 0.785          |
| <b>Diabetes mellitus, n (%)</b>        | 41(15.2)                       | 1(5.9)                                  | 40(15.8)                                      | 0.484          |
| <b>Hyperlipidemia, n (%)</b>           | 41(15.2)                       | 2(11.8)                                 | 39(15.4)                                      | 1.000          |
| <b>Smoking, n (%)</b>                  | 23(8.5)                        | 1(5.9)                                  | 22(8.7)                                       | 1.000          |
| <b>Previous stroke/TIA, n (%)</b>      | 7(2.6)                         | 1(5.9)                                  | 6(2.4)                                        | 0.369          |
| <b>Coronary heart disease, n (%)</b>   | 3(1.1)                         | 2(11.8)                                 | 1(0.4)                                        | 0.011          |
| <b>Atrial fibrillation, n (%)</b>      | 9(3.3)                         | 1(5.9)                                  | 8(3.2)                                        | 0.448          |
| <b>Initial NIHSS [median,(IQR)]</b>    | 2(0.75-5)                      | 5(1-8.5)                                | 2(0-4)                                        | 0.028          |
| <b>Stroke mechanism, n (%)</b>         |                                |                                         |                                               | 0.966          |
| <b>LAA</b>                             | 95(35.2)                       | 5(29.4)                                 | 90(35.6)                                      |                |
| <b>SVO</b>                             | 45(16.7)                       | 3(17.6)                                 | 42(16.6)                                      |                |
| <b>CE</b>                              | 40(14.8)                       | 3(17.6)                                 | 37(14.6)                                      |                |
| <b>Other determined</b>                | 39(14.4)                       | 2(11.8)                                 | 37(14.6)                                      |                |
| <b>Undetermined</b>                    | 51(18.9)                       | 4(23.5)                                 | 47(18.6)                                      |                |

|                                  |             |             |             |       |
|----------------------------------|-------------|-------------|-------------|-------|
| <b>eGFR (mean±SD),</b>           | 96.5±24.7   | 108.7±37.5  | 95.7±23.5   | 0.177 |
| <b>mL/min/1.73 m<sup>2</sup></b> |             |             |             |       |
| <b>Quartiles of Cystatin C</b>   |             |             |             | 0.162 |
| <b>Q1 (0.010-0.620)</b>          | 67(24.8)    | 3(17.6)     | 64(25.3)    |       |
| <b>Q2 (0.622-0.715)</b>          | 67(24.8)    | 4(23.5)     | 63(24.9)    |       |
| <b>Q3 (0.716-0.792)</b>          | 68(25.2)    | 8(47.1)     | 60(23.7)    |       |
| <b>Q4 (0.793-1.314)</b>          | 68(25.2)    | 2(11.8)     | 66(26.1)    |       |
| <b>Cystatin C, mg/L</b>          | 0.716±0.152 | 0.704±0.112 | 0.717±0.154 | 0.747 |

END: early neurological deterioration, BMI: body mass index, TIA: transient ischemic stack, LAA: large artery atherosclerosis, SVO: small-vessel occlusion, CE: cardioembolism, eGFR: estimated glomerular filtration rate

**Supplementary Table 3. Multivariate analysis using a usual definition for END (as ≥2 points of NIHSS within 72 hours of admission)**

|                   | <b>Unadjusted OR<br/>(95% CI)</b> | <b>P value</b> | <b>Adjusted OR(95%<br/>CI)</b> | <b>P value</b> |
|-------------------|-----------------------------------|----------------|--------------------------------|----------------|
| <b>Cystatin C</b> |                                   | 0.038          |                                | 0.047          |
| <b>Q1</b>         | 1 (Reference)                     |                | 1 (Reference)                  |                |
| <b>Q2</b>         | 1.36(0.63-2.97)                   | 0.434          | 2.14(0.88-5.22)                | 0.093          |
| <b>Q3</b>         | 2.11(1.02-4.34)                   | 0.044          | 2.85(1.18-6.91)                | 0.020          |
| <b>Q4</b>         | 2.56(1.26-5.20)                   | 0.009          | 3.56(1.43-8.86)                | 0.006          |
| <b>Age</b>        | 1.06(1.02-1.09)                   | 0.001          | 1.04(1.00-1.08)                | 0.062          |

|                    |                  |       |                  |       |
|--------------------|------------------|-------|------------------|-------|
| <b>CHD</b>         | 3.65(1.38-9.70)  | 0.009 | 3.22(1.05-9.93)  | 0.042 |
| <b>Infection</b>   | 2.24(1.11-4.52)  | 0.025 | 1.67(0.73-3.8)   | 0.224 |
| <b>WBC (10/ul)</b> | 5.44(0.99-29.84) | 0.051 | 3.75(0.59-23.93) | 0.162 |
| <b>FBS</b>         | 1.01(1.00-1.01)  | 0.014 | 1.01(1.00-1.01)  | 0.069 |

---

CHD: coronary heart disease, GFR: glomerular filtration rate, WBC: white blood cell, FBS: fasting blood sugar,

Adjusting for cystatin C, age, sex, hypertension, smoking, CHD, previous stroke/TIA, lesion location, GFR, FBS, WBC, Hemoglobin, HDL, TG, infections, significant stenosis
